# Supplementary material
Source: Springer Nature journal article supplement (https://www.springermedizin.de/resource/supplementary/12881_2008_437_MOESM4_ESM.pdf/9450650)
Supplement: MOESM4 [file 9450650]

Table S3

## Linkage disequilibrium structure at candidate genes

| <i>CRP</i> (pair-wise $D'$ statistic) |                          |                          |                  |                  |                  |                  |                  |
|---------------------------------------|--------------------------|--------------------------|------------------|------------------|------------------|------------------|------------------|
|                                       | <b>Rs3091244<br/>C/T</b> | <b>Rs3091244<br/>C/A</b> | <b>Rs1800947</b> | <b>Rs1130864</b> | <b>rs1205</b>    | <b>Rs2808630</b> | <b>Rs3090077</b> |
| <b>Rs3091244 C/T</b>                  | .                        | 0.9980                   | 0.8708           | 0.9743           | 0.9863           | 0.9416           | 0.9961           |
| <b>Rs3091244<br/>C/A</b>              | .                        | .                        | 0.9916           | 0.6325           | 0.9182           | 0.8865           | 0.9588           |
| <b>Rs1800947</b>                      | .                        | .                        | .                | 0.9980           | 0.9991           | 0.9978           | 0.9833           |
| <b>Rs1130864</b>                      | .                        | .                        | .                | .                | 0.9996           | 0.9991           | 0.9962           |
| <b>Rs2808630</b>                      | .                        | .                        | .                | .                | .                | 0.9992           | 0.9965           |
| <b>Rs2808630</b>                      | .                        | .                        | .                | .                | .                | .                | 0.9957           |
| <b>Rs3090077</b>                      | .                        | .                        | .                | .                | .                | .                | .                |
| <i>IL6</i> (pair-wise $D'$ statistic) |                          |                          |                  |                  |                  |                  |                  |
|                                       | <b>Rs2069825</b>         | <b>Rs2069827</b>         | <b>Rs1800797</b> | <b>Rs2069840</b> | <b>Rs1554606</b> | <b>Rs2069861</b> | <b>Rs1818879</b> |
| <b>Rs2069825</b>                      | .                        | 0.9989                   | 0.9666           | 0.9633           | 0.9655           | 0.9988           | 0.6508           |
| <b>Rs2069827</b>                      | .                        | .                        | 0.9988           | 0.998            | 0.9988           | 0.9927           | 0.6277           |
| <b>Rs1800797</b>                      | .                        | .                        | .                | 0.9569           | 0.9568           | 0.9988           | 0.6819           |
| <b>Rs2069840</b>                      | .                        | .                        | .                | .                | 0.9996           | 0.9979           | 0.6401           |
| <b>Rs1554606</b>                      | .                        | .                        | .                | .                | .                | 0.9987           | 0.7124           |
| <b>Rs2069861</b>                      | .                        | .                        | .                | .                | .                | .                | 0.6002           |
| <b>Rs1818879</b>                      | .                        | .                        | .                | .                | .                | .                | .                |
| <i>FGB</i> (pair-wise $D'$ statistic) |                          |                          |                  |                  |                  |                  |                  |
|                                       | <b>Rs1800791</b>         | <b>Rs1800788</b>         | <b>Rs1800787</b> | <b>Rs2217421</b> |                  |                  |                  |
| <b>Rs1800791</b>                      | .                        | 0.9980                   | 0.9979           | 0.9986           |                  |                  |                  |
| <b>Rs1800788</b>                      | .                        | .                        | 0.9336           | 0.9740           |                  |                  |                  |
| <b>Rs1800787</b>                      | .                        | .                        | .                | 0.9992           |                  |                  |                  |
| <b>Rs2217421</b>                      | .                        | .                        | .                | .                |                  |                  |                  |
